# Supplementary material for: Chemical transformation mechanism for blue-to-green emitting CsPbBr3 nanocrystals
Source: Royal Society of Chemistry journal article supplement (doi:10.1039/d3nr05215j), 2024-01-01
Supplement: d3nr05215j1.pdf [file d3nr05215j1.pdf]

## Supporting Information

### Chemical Transformation Mechanism for Blue-to-Green Emitting CsPbBr<sub>3</sub> Nanocrystals

Yuling Liu,<sup>[a]</sup> <sup>1</sup> Rui Yun,<sup>[a]</sup> <sup>1</sup> Yue Li,<sup>[a]</sup> Wenda Sun,<sup>[a]</sup> Tiancheng Zheng,<sup>[a]</sup> Qian Huang,<sup>[a]</sup> Libing Zhang,<sup>[b]</sup>  
Xiyang Li<sup>\*[a]</sup>

<sup>[a]</sup> Institute of Photoelectronic Thin Film Devices and Technology, Solar Energy Conversion Center, Nankai University, Tianjin 300350, P. R. China; Key Laboratory of Efficient Utilization of solar energy of Tianjin, Tianjin 300071, P. R. China; Engineering Research Center of Thin Film Photoelectronic Technology of Ministry of Education, Tianjin 300350, P. R. China

<sup>[b]</sup> Tianjin Key Laboratory of Molecular Optoelectronic, Department of Chemistry, Tianjin University, Tianjin 300072, P. R. China

<sup>1</sup> Equally contributed author

\* Corresponding author

## Experimental Section

### Chemicals

Cesium Carbonate ( $\text{Cs}_2\text{CO}_3$ , 99.99%), Oleic acid (OA, AR), Cyclohexane (99.5%), Nitrosonium tetrafluoroborate ( $\text{NOBF}_4$ , 95%), Oleylamine (OAm, 80%-90%), 1-Octadecene (ODE, 90%) and Hydrobromic acid (HBr, 48 wt% in  $\text{H}_2\text{O}$ ) were purchased from Aladdin. Lead bromide ( $\text{PbBr}_2$ , 98%) was purchased from Alfa. All of raw materials were used as received without further purification.

### Synthesis and isolation of $\text{Cs}_4\text{PbBr}_6$ NCs

The synthesis details were showed in the experiment section of our previous report.<sup>1</sup>

### Synthesis of $\text{CsPbBr}_3$ NCs products

In this experiment, different amounts of  $\text{NOBF}_4$  (1.0 mg, 1.5 mg, 1.8 mg, 2.5 mg and 3.5 mg) were individually added into 2 mL of cyclohexane. Subsequently, 100  $\mu\text{L}$  of colloidal  $\text{Cs}_4\text{PbBr}_6$  NCs were rapidly injected into the mixture while stirring vigorously at room temperature.

### Characterization

The Photoluminescence (PL), time-resolved PL spectra, and photoluminescence quantum yield (PLQY) were recorded using an Edinburgh Instruments FS5 spectrofluorometer (UK) equipped with a built-in integrating sphere and a pulsed laser emitting at 405 nm. Absorption spectra were analyzed employing a Shimadzu UV-2600 spectrophotometer (Japan) in the UV-Vis spectral region. Powder X-ray diffraction (XRD) measurements using a Japan Rigaku X-ray diffractometer equipped with  $\text{Cu K}\alpha$  radiation ( $\lambda = 1.5405 \text{ \AA}$ ), operating at 40 kV and 40 mA. X-ray photoelectron spectroscopy (XPS) spectra were obtained using a Thermo ESCALAB 250XI X-ray photoelectron spectrometer (USA) with an  $\text{Al K}\alpha$  source. For both XRD and XPS analyses, samples were prepared by depositing colloidal solutions onto glass substrates and subsequently heating them to 60  $^\circ\text{C}$ , facilitating the rapid evaporation of the solvent. Transmission electron microscopy (TEM) measurements were performed with a JEM-2800 TEM (Japan) operating at an accelerating voltage of 200 kV. The dispersed nanocrystal (NCs) solution was applied onto a TEM grid and allowed to air-dry under ambient conditions. Fourier-transform infrared spectroscopy (FTIR) spectra were acquired using a Thermo Nicolet IS50 spectrometer (USA) employing the KBr pellet technique, spanning the range of 4000 to 600  $\text{cm}^{-1}$ .

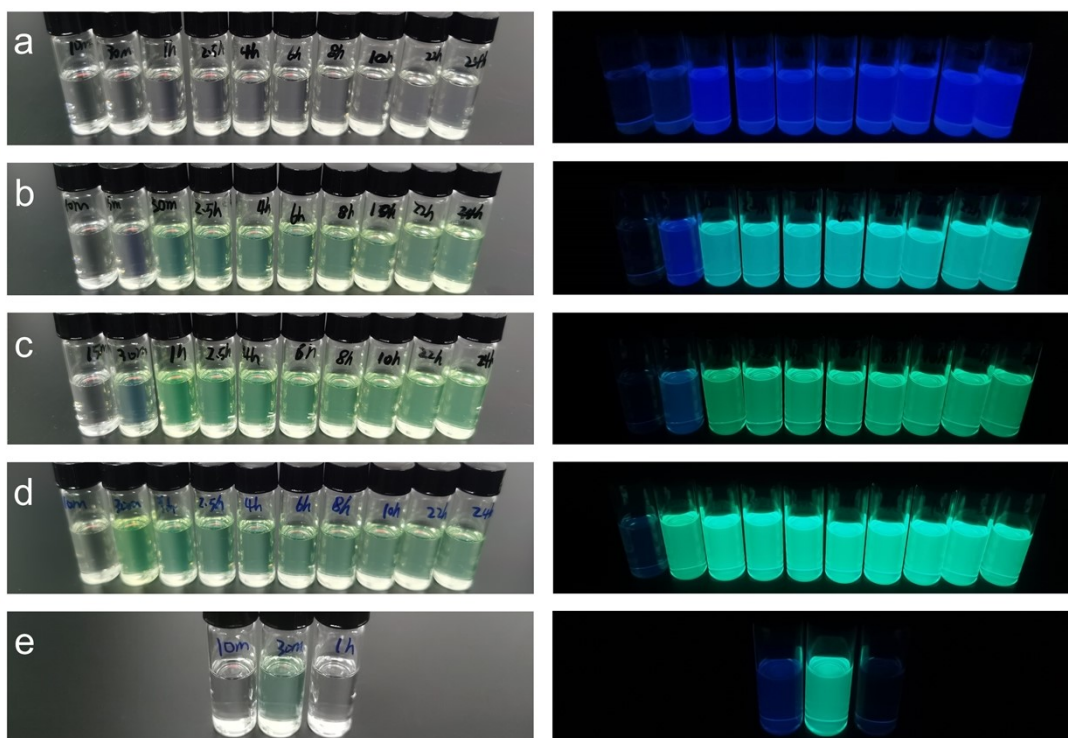

**Figure S1.** Photographs of the products under the ambient light (left) and 365 nm UV light irradiation (right) prepared with (a) 1.0 mg, (b) 1.5 mg, (c) 1.8 mg, (d) 2.5 mg and (e) 3.5 mg  $\text{NOBF}_4$  at different reaction time.

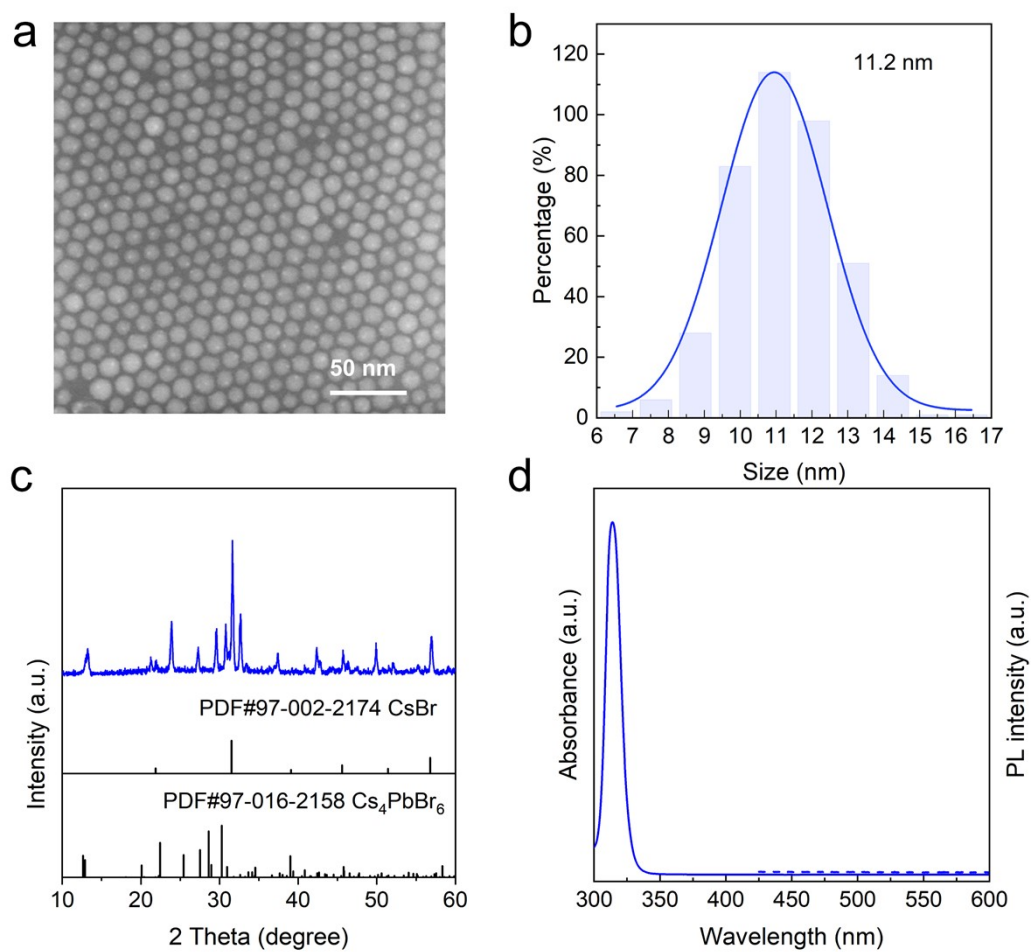

**Figure S2.** (a) TEM image, (b) the size distribution, (c) XRD pattern and (d) PL and Absorption spectra of Cs<sub>4</sub>PbBr<sub>6</sub> NCs.

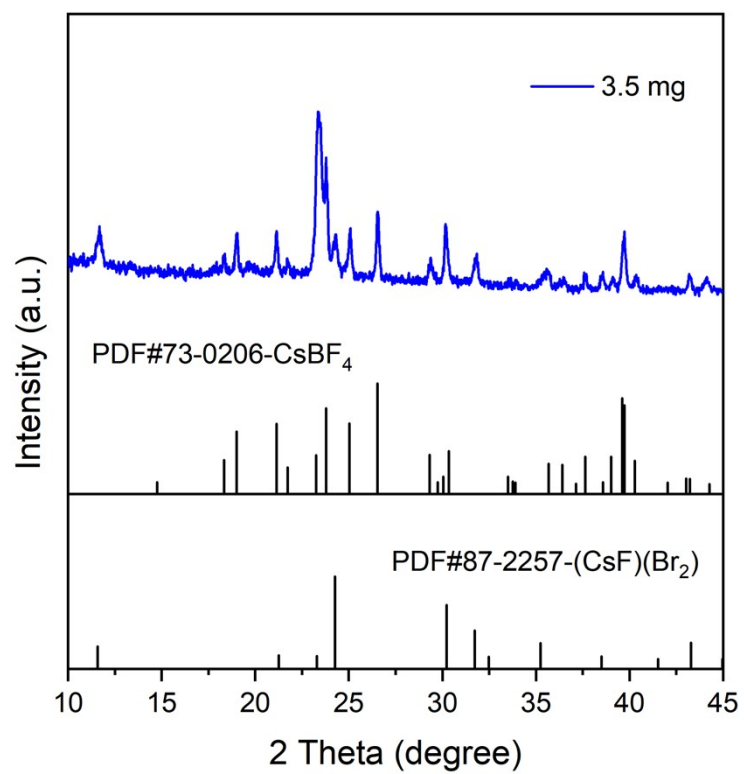

**Figure S3.** The XRD patterns of the nonluminescent products synthesized with 3.5 mg NOBF<sub>4</sub>.

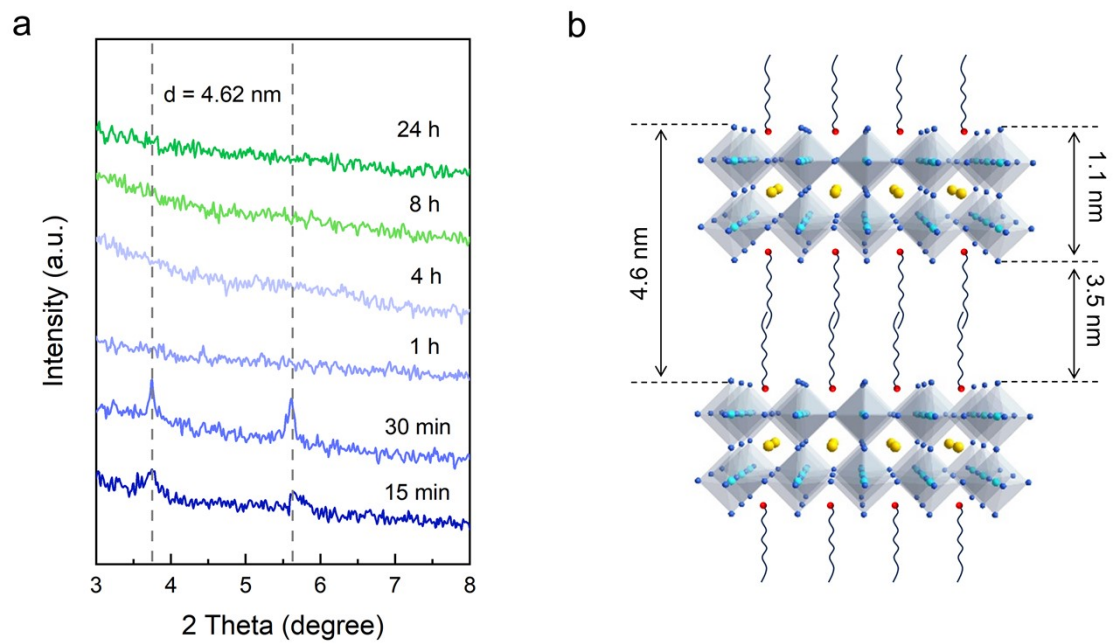

**Figure S4.** (a) Small angle XRD pattern of the products obtained with 1.8 mg NOBF<sub>4</sub> at different times. (b) Schematic diagram of the assembled CsPbBr<sub>3</sub> NPLs.

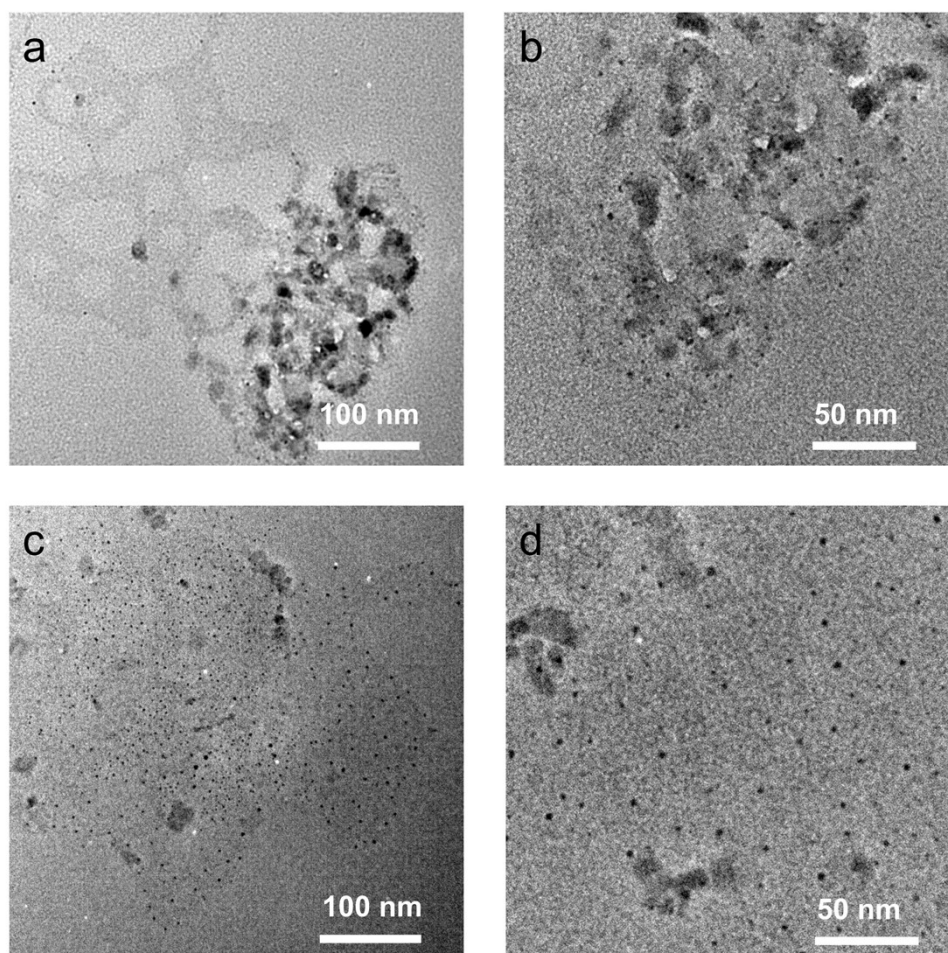

**Figure S5.** The TEM images of the luminescent products obtained with 1.8 mg  $\text{NOBF}_4$  at (a, b) 15 min, (c, d) 30 min.

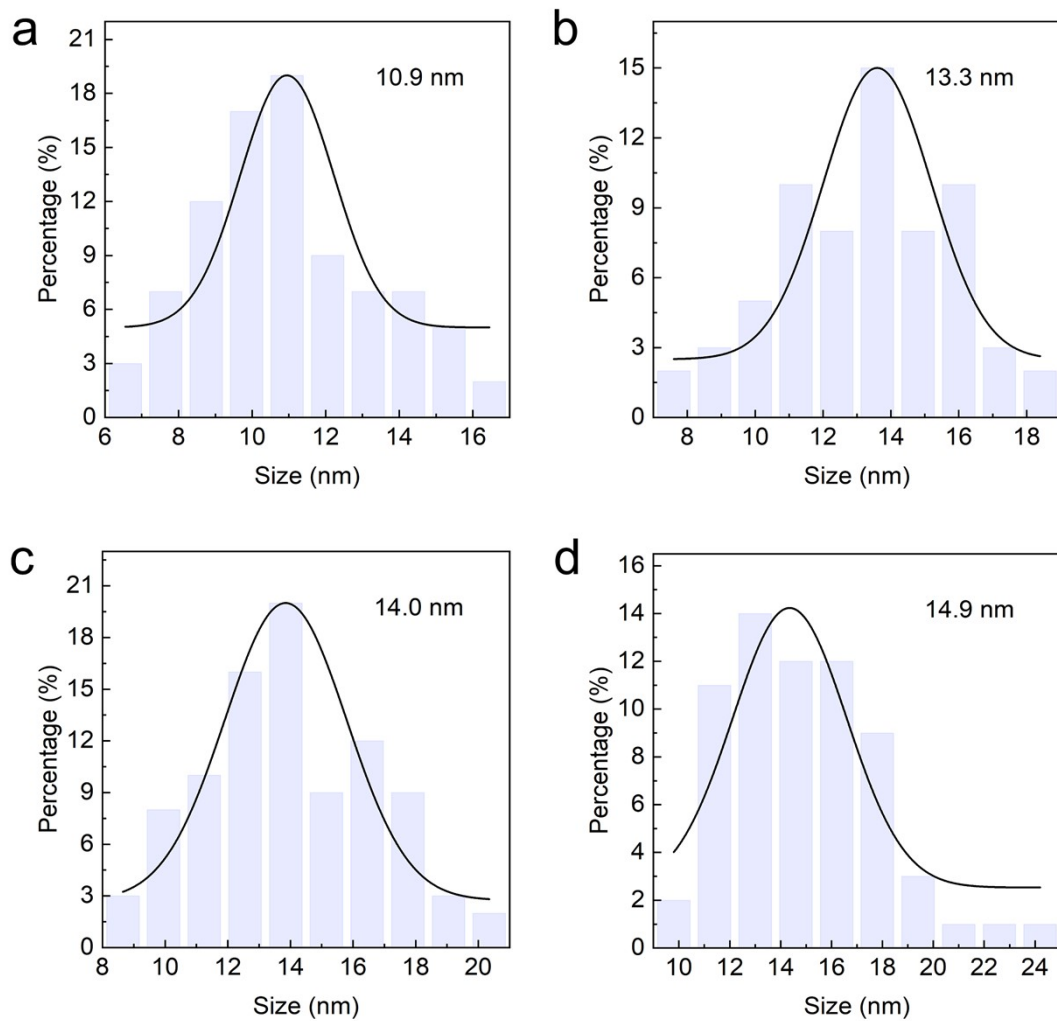

**Figure S6.** Size distribution of the newly formed CsPbBr<sub>3</sub> NCs obtained with 1.8 mg NOBF<sub>4</sub> at (a) 1h, (b) 4h, (c) 8h and (d) 24h.



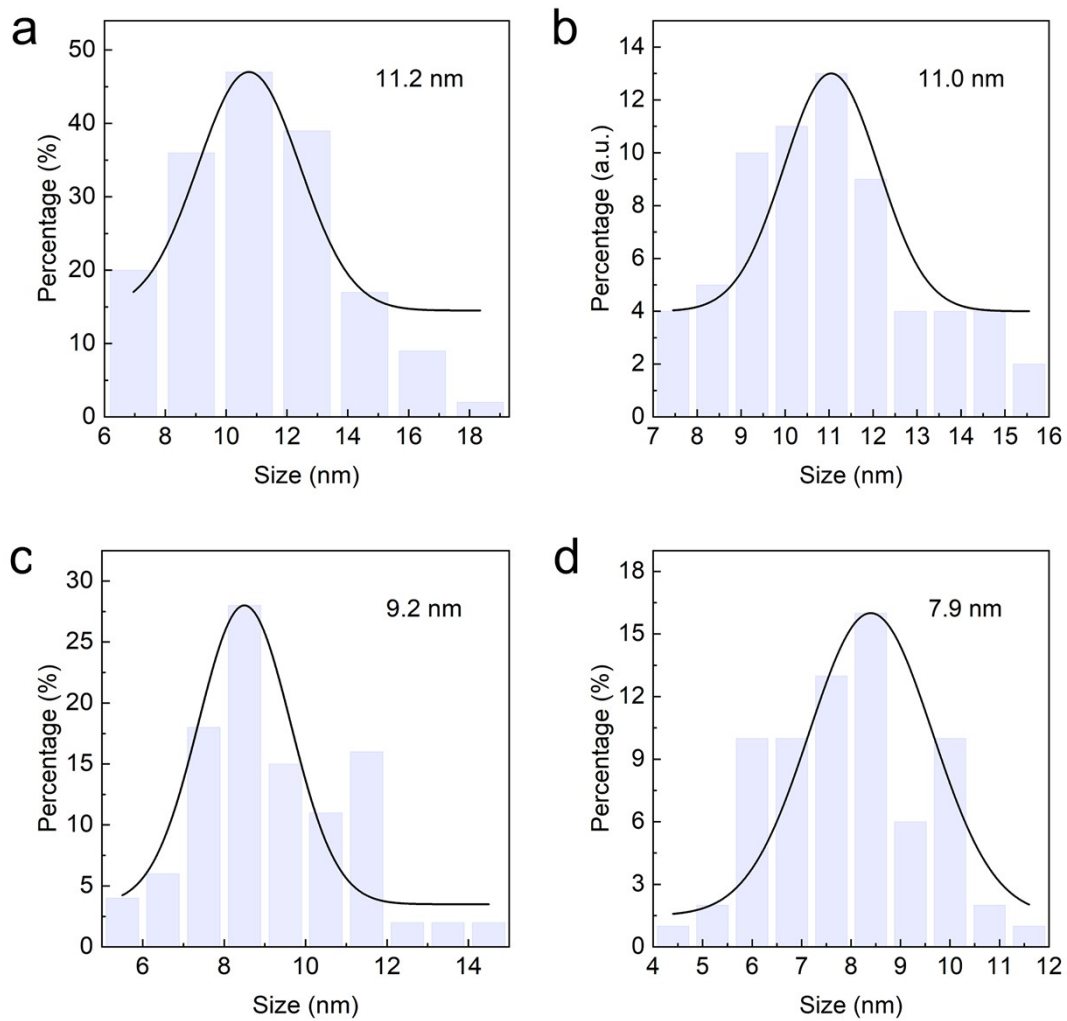

**Figure S7.** Size distribution of pristine  $\text{Cs}_4\text{PbBr}_6$  NCs obtained at (a) 1h, (b) 4h, (c) 8h and (d) 24h.

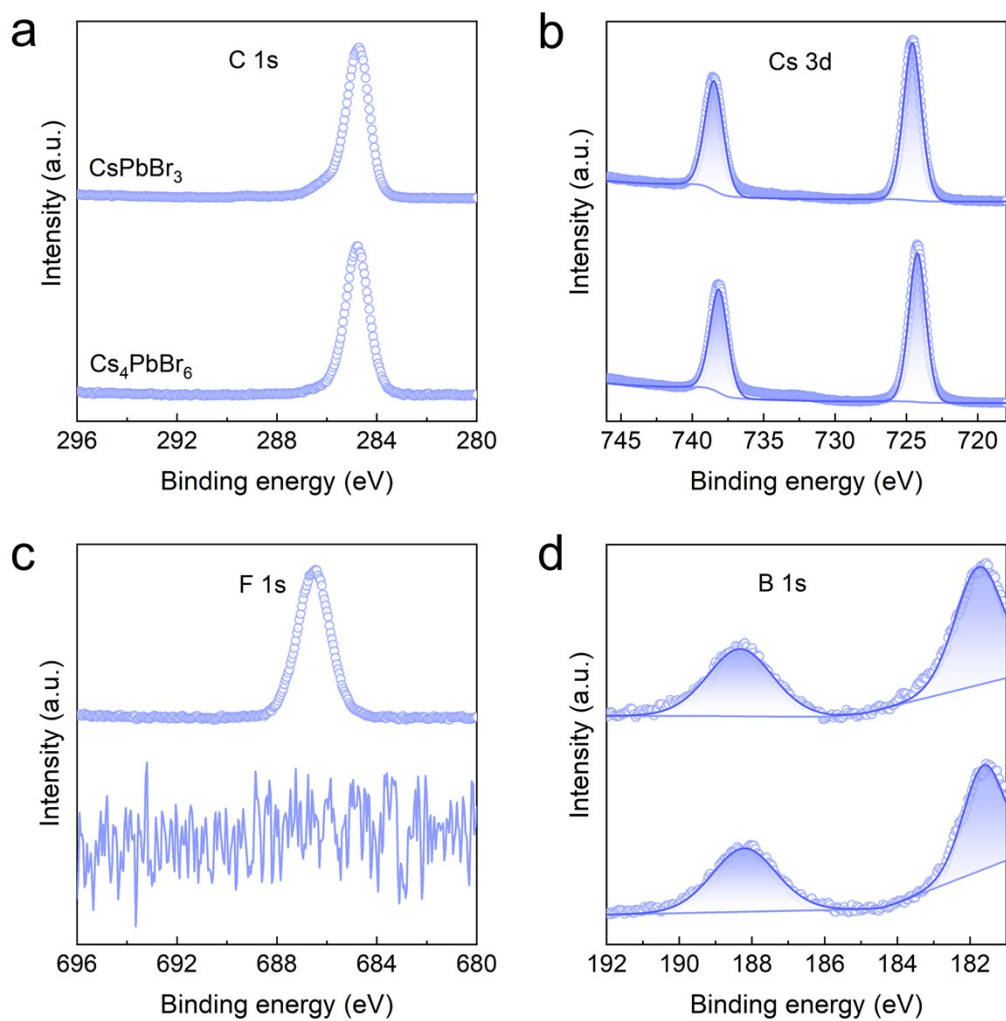

**Figure S8.** High-resolution XPS spectra for (a) C-1s, (b) Cs-3d, (c) F-1s, (d) B-1s.

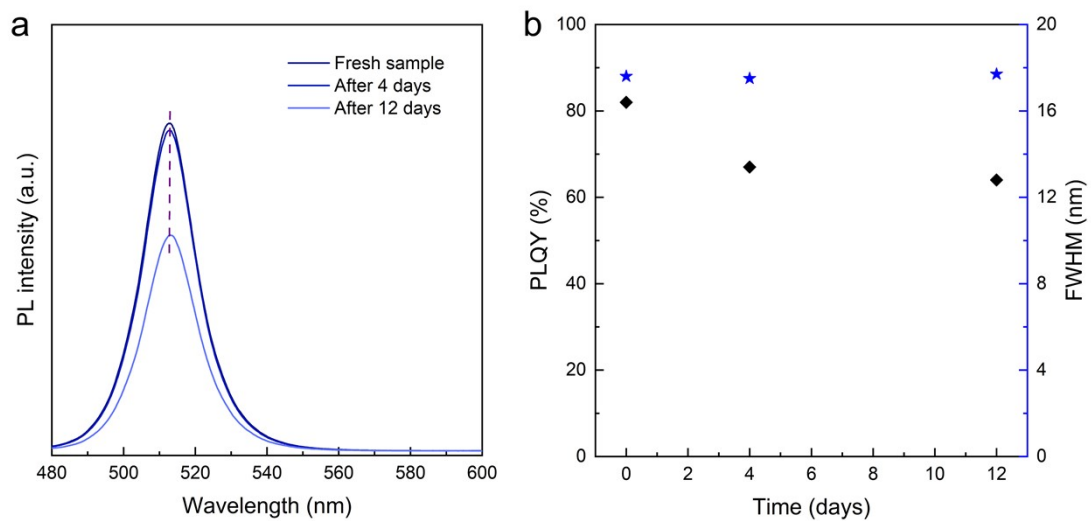

**Figure S9.** (a) The PL spectra, (b) FWHM and PLQY of the luminescent products stored in the cyclohexane.

**Table S1.** Fitting data for PL decay of luminescent products synthesized with 1.8 mg NOBF<sub>4</sub> at different reaction time.

| Reaction time (h)    | 2.5  | 4    | 6     | 8    | 10   | 22   | 24   |
|----------------------|------|------|-------|------|------|------|------|
| A <sub>1</sub> (%)   | 0.08 | 0.77 | 0.87  | 0.26 | 0.69 | 0.39 | 0.49 |
| T <sub>1</sub> (%)   | 1.62 | 4.13 | 4.38  | 2.86 | 3.88 | 0.58 | 3.55 |
| A <sub>2</sub> (%)   | 0.83 | 0.19 | 0.06  | 0.71 | 0.32 | 0.87 | 0.48 |
| T <sub>2</sub> (%)   | 4.97 | 7.42 | 11.58 | 5.41 | 6.53 | 4.78 | 5.86 |
| T <sub>ave</sub> (%) | 4.90 | 5.20 | 5.50  | 5.00 | 5.00 | 4.80 | 5.00 |

**Table S2.** Fitting data for PL decay of luminescent products synthesized with 2.5 mg NOBF<sub>4</sub> at different reaction time.

| Reaction time (h)    | 1    | 2.5  | 4    | 6    | 8     | 10   | 22   | 24   |
|----------------------|------|------|------|------|-------|------|------|------|
| A <sub>1</sub> (%)   | 0.04 | 0.03 | 0.05 | 0.04 | 0.79  | 0.05 | 0.05 | 0.05 |
| T <sub>1</sub> (%)   | 0.76 | 0.68 | 1.14 | 0.87 | 3.87  | 1.15 | 0.76 | 0.67 |
| A <sub>2</sub> (%)   | 0.84 | 0.83 | 0.83 | 0.86 | 0.05  | 0.82 | 0.84 | 0.86 |
| T <sub>2</sub> (%)   | 4.38 | 4.20 | 4.26 | 4.25 | 10.08 | 4.26 | 4.22 | 4.17 |
| T <sub>ave</sub> (%) | 4.40 | 4.20 | 4.20 | 4.20 | 4.70  | 4.20 | 4.20 | 4.10 |

## Reference

1 R. Yun, H. Yang, Y. Li, Y. Liu, Y. Chu, S. Wu, X. Liu, X. Zhang, L. Zhang and X. Li, Inorganic Ligand Triggered Transformation from Cs<sub>4</sub>PbBr<sub>6</sub> Nanocrystals to Blue-Emitting CsPbBr<sub>3</sub> Nanoplatelets, *Chem. Mater.*, 2023, **35**, 424-431.
